# Supplementary material for: Comparison of four machine learning models for forecasting daily reference evaporation based on public weather forecast data
Source: Copernicus journal article supplement (doi:10.5194/hess-2023-158), 2023-07-31
Supplement: Supplementary file 1 [file hess-2023-158-supplement.pdf]

Table

Forecast performance statistics of weather forecast variables for 1-7 days for the 2020-2021 forecasting period at nine study sites

| Station | Leadtime       | Tmax        |             |             |             | Tmin        |             |             |             | Wind speed           |                      |             |             | Sunshine duration |             |             |             |
|---------|----------------|-------------|-------------|-------------|-------------|-------------|-------------|-------------|-------------|----------------------|----------------------|-------------|-------------|-------------------|-------------|-------------|-------------|
|         |                | MAE         | RMSE        | R           | RM          | MAE         | RMSE        | R           | RM          | MAE                  | RMSE                 | R           | RM          | MAE               | RMSE        | R           | RM          |
|         |                | (°C)        | (°C)        |             |             | (°C)        | (°C)        |             |             | (m s <sup>-1</sup> ) | (m s <sup>-1</sup> ) |             |             | (h)               | (h)         |             |             |
| HN      | 1              | 2.45        | 3.17        | 0.96        | 0.99        | 2.39        | 3.04        | 0.96        | 1.00        | 1.42                 | 2.13                 | 0.24        | 2.95        | 2.96              | 3.53        | 0.48        | 0.81        |
|         | 2              | 3.27        | 4.23        | 0.94        | 0.99        | 3.14        | 3.90        | 0.94        | 1.01        | 1.49                 | 2.27                 | 0.00        | 1.36        | 3.45              | 4.19        | 0.21        | 0.78        |
|         | 3              | 3.73        | 4.74        | 0.92        | 0.99        | 3.36        | 4.16        | 0.93        | 1.02        | 1.41                 | 2.18                 | 0.01        | 1.32        | 3.65              | 4.37        | 0.11        | 0.78        |
|         | 4              | 3.89        | 5.04        | 0.91        | 0.98        | 3.50        | 4.35        | 0.93        | 1.05        | 1.22                 | 1.93                 | -0.08       | 1.18        | 3.54              | 4.31        | 0.11        | 0.82        |
|         | 5              | 4.02        | 5.16        | 0.90        | 0.99        | 3.66        | 4.56        | 0.92        | 1.03        | 1.23                 | 1.92                 | -0.07       | 1.18        | 3.56              | 4.35        | 0.11        | 0.83        |
|         | 6              | 4.11        | 5.21        | 0.90        | 0.99        | 3.58        | 4.51        | 0.92        | 1.04        | 1.22                 | 1.91                 | -0.03       | 1.20        | 3.60              | 4.37        | 0.09        | 0.82        |
|         | 7              | 4.02        | 5.14        | 0.90        | 0.99        | 3.57        | 4.47        | 0.92        | 1.04        | 1.29                 | 2.03                 | 0.04        | 1.25        | 3.47              | 4.20        | 0.16        | 0.81        |
|         | <b>Average</b> | <b>3.64</b> | <b>4.67</b> | <b>0.92</b> | <b>0.99</b> | <b>3.31</b> | <b>4.14</b> | <b>0.93</b> | <b>1.03</b> | <b>1.33</b>          | <b>2.05</b>          | <b>0.02</b> | <b>1.49</b> | <b>3.46</b>       | <b>4.19</b> | <b>0.18</b> | <b>0.81</b> |
| YC      | 1              | 2.47        | 3.18        | 0.96        | 1.00        | 2.14        | 2.69        | 0.97        | 1.04        | 1.48                 | 2.28                 | 0.20        | 1.95        | 2.60              | 3.17        | 0.55        | 0.89        |
|         | 2              | 3.21        | 4.22        | 0.93        | 1.00        | 2.86        | 3.56        | 0.95        | 1.05        | 1.48                 | 2.31                 | -0.03       | 1.93        | 3.20              | 3.90        | 0.27        | 0.86        |
|         | 3              | 3.70        | 4.77        | 0.91        | 1.00        | 3.10        | 3.90        | 0.93        | 1.06        | 1.39                 | 2.18                 | -0.03       | 1.87        | 3.41              | 4.12        | 0.16        | 0.86        |
|         | 4              | 3.91        | 5.04        | 0.91        | 0.99        | 3.39        | 4.27        | 0.92        | 1.11        | 1.05                 | 1.74                 | -0.04       | 1.63        | 3.46              | 4.24        | 0.10        | 0.89        |
|         | 5              | 3.95        | 5.09        | 0.90        | 0.98        | 3.46        | 4.35        | 0.92        | 1.10        | 1.09                 | 1.80                 | -0.02       | 1.66        | 3.45              | 4.26        | 0.12        | 0.89        |
|         | 6              | 3.93        | 5.10        | 0.90        | 0.98        | 3.38        | 4.27        | 0.92        | 1.10        | 1.11                 | 1.78                 | 0.01        | 1.67        | 3.46              | 4.27        | 0.10        | 0.88        |
|         | 7              | 4.16        | 5.32        | 0.89        | 0.99        | 3.38        | 4.29        | 0.92        | 1.09        | 1.09                 | 1.80                 | 0.02        | 1.66        | 3.38              | 4.20        | 0.14        | 0.87        |
|         | <b>Average</b> | <b>3.62</b> | <b>4.67</b> | <b>0.92</b> | <b>0.99</b> | <b>3.10</b> | <b>3.91</b> | <b>0.93</b> | <b>1.08</b> | <b>1.24</b>          | <b>1.98</b>          | <b>0.02</b> | <b>1.77</b> | <b>3.28</b>       | <b>4.02</b> | <b>0.20</b> | <b>0.88</b> |
| ZW      | 1              | 2.80        | 3.60        | 0.95        | 0.99        | 2.49        | 3.19        | 0.96        | 1.05        | 1.39                 | 2.13                 | 0.32        | 1.31        | 2.87              | 3.53        | 0.46        | 0.92        |
|         | 2              | 3.57        | 4.68        | 0.91        | 1.00        | 3.16        | 3.96        | 0.93        | 1.06        | 1.47                 | 2.23                 | 0.07        | 1.28        | 3.48              | 4.27        | 0.16        | 0.88        |
|         | 3              | 3.98        | 5.15        | 0.89        | 0.99        | 3.32        | 4.14        | 0.93        | 1.05        | 1.44                 | 2.18                 | 0.01        | 1.25        | 3.68              | 4.47        | 0.04        | 0.90        |
|         | 4              | 4.23        | 5.42        | 0.88        | 0.99        | 3.64        | 4.53        | 0.91        | 1.06        | 1.19                 | 1.83                 | -0.05       | 1.10        | 3.57              | 4.39        | 0.10        | 0.91        |
|         | 5              | 4.34        | 5.47        | 0.88        | 0.99        | 3.70        | 4.57        | 0.91        | 1.05        | 1.23                 | 1.90                 | -0.08       | 1.11        | 3.67              | 4.47        | 0.05        | 0.91        |
|         | 6              | 4.33        | 5.50        | 0.88        | 0.99        | 3.69        | 4.61        | 0.91        | 1.08        | 1.24                 | 1.92                 | -0.03       | 1.11        | 3.58              | 4.36        | 0.10        | 0.92        |
|         | 7              | 4.29        | 5.48        | 0.88        | 1.00        | 3.67        | 4.72        | 0.91        | 1.09        | 1.23                 | 1.88                 | 0.04        | 1.13        | 3.52              | 4.30        | 0.13        | 0.91        |
|         | <b>Average</b> | <b>3.93</b> | <b>5.04</b> | <b>0.89</b> | <b>0.99</b> | <b>3.38</b> | <b>4.24</b> | <b>0.92</b> | <b>1.06</b> | <b>1.31</b>          | <b>2.01</b>          | <b>0.04</b> | <b>1.18</b> | <b>3.48</b>       | <b>4.25</b> | <b>0.15</b> | <b>0.91</b> |
| ZN      | 1              | 2.74        | 3.52        | 0.95        | 0.99        | 2.28        | 2.93        | 0.96        | 0.98        | 1.46                 | 2.28                 | 0.35        | 1.63        | 2.58              | 3.27        | 0.49        | 0.92        |
|         | 2              | 3.56        | 4.72        | 0.91        | 0.99        | 2.91        | 3.70        | 0.94        | 0.98        | 1.50                 | 2.39                 | 0.02        | 1.60        | 3.24              | 4.02        | 0.19        | 0.87        |
|         | 3              | 3.96        | 5.16        | 0.90        | 0.99        | 3.19        | 3.95        | 0.93        | 1.00        | 1.40                 | 2.24                 | 0.01        | 1.54        | 3.42              | 4.22        | 0.07        | 0.89        |
|         | 4              | 4.17        | 5.41        | 0.89        | 0.99        | 3.59        | 4.51        | 0.91        | 1.04        | 1.04                 | 1.77                 | -0.04       | 1.31        | 3.36              | 4.23        | 0.10        | 0.91        |
|         | 5              | 4.34        | 5.54        | 0.88        | 0.99        | 3.62        | 4.49        | 0.91        | 1.06        | 1.11                 | 1.85                 | -0.07       | 1.35        | 3.41              | 4.27        | 0.07        | 0.92        |
|         | 6              | 4.40        | 5.62        | 0.88        | 0.99        | 3.53        | 4.39        | 0.91        | 1.07        | 1.18                 | 1.95                 | -0.06       | 1.39        | 3.40              | 4.22        | 0.08        | 0.91        |
|         | 7              | 4.41        | 5.65        | 0.87        | 1.00        | 3.50        | 4.46        | 0.91        | 1.06        | 1.13                 | 1.85                 | 0.05        | 1.38        | 3.27              | 4.10        | 0.14        | 0.90        |
|         | <b>Average</b> | <b>3.94</b> | <b>5.09</b> | <b>0.90</b> | <b>0.99</b> | <b>3.23</b> | <b>4.06</b> | <b>0.92</b> | <b>1.03</b> | <b>1.26</b>          | <b>2.05</b>          | <b>0.04</b> | <b>1.46</b> | <b>3.24</b>       | <b>4.05</b> | <b>0.16</b> | <b>0.90</b> |
| YAC     | 1              | 2.63        | 3.47        | 0.95        | 0.98        | 2.74        | 3.46        | 0.95        | 0.97        | 1.41                 | 2.26                 | 0.22        | 1.50        | 3.16              | 3.85        | 0.44        | 0.78        |
|         | 2              | 3.57        | 4.62        | 0.92        | 0.97        | 3.48        | 4.27        | 0.93        | 0.96        | 1.49                 | 2.34                 | 0.07        | 1.50        | 3.63              | 4.38        | 0.24        | 0.75        |
|         | 3              | 4.02        | 5.16        | 0.90        | 0.97        | 3.70        | 4.59        | 0.92        | 0.98        | 1.41                 | 2.25                 | 0.01        | 1.44        | 3.67              | 4.44        | 0.19        | 0.76        |
|         | 4              | 4.36        | 5.58        | 0.88        | 0.96        | 3.97        | 4.97        | 0.90        | 0.96        | 1.16                 | 1.88                 | -0.07       | 1.27        | 3.81              | 4.58        | 0.14        | 0.77        |

|    |                |             |             |             |             |             |             |             |             |             |             |             |             |             |             |             |             |
|----|----------------|-------------|-------------|-------------|-------------|-------------|-------------|-------------|-------------|-------------|-------------|-------------|-------------|-------------|-------------|-------------|-------------|
|    | 5              | 4.43        | 5.63        | 0.88        | 0.96        | 4.11        | 5.15        | 0.90        | 0.98        | 1.17        | 1.90        | -0.02       | 1.29        | 3.78        | 4.57        | 0.13        | 0.77        |
|    | 6              | 4.34        | 5.63        | 0.88        | 0.96        | 4.06        | 5.12        | 0.90        | 1.03        | 1.26        | 2.07        | 0.03        | 1.35        | 3.84        | 4.64        | 0.08        | 0.79        |
|    | 7              | 4.40        | 5.62        | 0.88        | 0.97        | 3.98        | 5.05        | 0.90        | 1.01        | 1.24        | 1.98        | 0.03        | 1.35        | 3.76        | 4.56        | 0.14        | 0.77        |
|    | <b>Average</b> | <b>3.96</b> | <b>5.10</b> | <b>0.90</b> | <b>0.97</b> | <b>3.72</b> | <b>4.66</b> | <b>0.91</b> | <b>0.98</b> | <b>1.30</b> | <b>2.10</b> | <b>0.04</b> | <b>1.39</b> | <b>3.66</b> | <b>4.43</b> | <b>0.20</b> | <b>0.77</b> |
| HY | 1              | 2.85        | 3.67        | 0.93        | 0.98        | 1.81        | 2.35        | 0.97        | 0.99        | 1.39        | 2.13        | 0.24        | 1.22        | 3.02        | 3.68        | 0.46        | 0.92        |
|    | 2              | 3.79        | 4.85        | 0.88        | 0.99        | 2.46        | 3.19        | 0.94        | 1.00        | 1.49        | 2.27        | 0.03        | 1.21        | 3.76        | 4.56        | 0.12        | 0.89        |
|    | 3              | 4.07        | 5.18        | 0.87        | 0.98        | 2.94        | 3.75        | 0.92        | 1.02        | 1.44        | 2.20        | -0.01       | 1.18        | 3.94        | 4.74        | 0.02        | 0.90        |
|    | 4              | 4.36        | 5.54        | 0.85        | 0.97        | 3.15        | 4.02        | 0.91        | 1.07        | 1.21        | 1.85        | 0.02        | 1.05        | 3.81        | 4.63        | 0.09        | 0.91        |
|    | 5              | 4.51        | 5.66        | 0.84        | 0.97        | 3.26        | 4.16        | 0.90        | 1.05        | 1.24        | 1.88        | 0.01        | 1.05        | 3.83        | 4.72        | 0.04        | 0.93        |
|    | 6              | 4.61        | 5.79        | 0.83        | 0.98        | 3.29        | 4.18        | 0.90        | 1.06        | 1.23        | 1.89        | 0.02        | 1.06        | 3.90        | 4.77        | 0.02        | 0.90        |
|    | 7              | 4.54        | 5.74        | 0.84        | 0.99        | 3.37        | 4.20        | 0.90        | 1.08        | 1.24        | 1.89        | 0.07        | 1.09        | 3.81        | 4.64        | 0.07        | 0.89        |
|    | <b>Average</b> | <b>4.10</b> | <b>5.21</b> | <b>0.86</b> | <b>0.98</b> | <b>2.90</b> | <b>3.69</b> | <b>0.92</b> | <b>1.04</b> | <b>1.32</b> | <b>2.02</b> | <b>0.05</b> | <b>1.12</b> | <b>3.73</b> | <b>4.53</b> | <b>0.12</b> | <b>0.91</b> |
| TX | 1              | 2.82        | 3.69        | 0.94        | 0.98        | 2.08        | 2.65        | 0.97        | 0.98        | 1.48        | 2.00        | 0.35        | 1.01        | 2.97        | 3.67        | 0.46        | 0.90        |
|    | 2              | 3.70        | 4.82        | 0.90        | 0.98        | 2.70        | 3.42        | 0.95        | 0.96        | 1.72        | 2.32        | 0.07        | 1.01        | 3.65        | 4.48        | 0.14        | 0.86        |
|    | 3              | 4.10        | 5.30        | 0.88        | 0.98        | 2.98        | 3.74        | 0.94        | 0.98        | 1.70        | 2.29        | 0.03        | 0.99        | 3.82        | 4.63        | 0.04        | 0.88        |
|    | 4              | 4.39        | 5.56        | 0.87        | 0.98        | 3.23        | 4.05        | 0.93        | 1.02        | 1.55        | 2.11        | 0.04        | 1.01        | 3.66        | 4.49        | 0.14        | 0.88        |
|    | 5              | 4.48        | 5.66        | 0.87        | 0.98        | 3.35        | 4.22        | 0.92        | 1.04        | 1.59        | 2.18        | 0.02        | 1.03        | 3.78        | 4.65        | 0.06        | 0.90        |
|    | 6              | 4.54        | 5.87        | 0.86        | 0.98        | 3.35        | 4.16        | 0.92        | 1.06        | 1.63        | 2.21        | 0.01        | 1.05        | 3.87        | 4.70        | 0.04        | 0.88        |
|    | 7              | 4.63        | 5.79        | 0.86        | 1.00        | 3.24        | 4.13        | 0.92        | 1.06        | 1.64        | 2.24        | 0.07        | 1.10        | 3.72        | 4.54        | 0.12        | 0.86        |
|    | <b>Average</b> | <b>4.10</b> | <b>5.24</b> | <b>0.88</b> | <b>0.98</b> | <b>2.99</b> | <b>3.77</b> | <b>0.94</b> | <b>1.02</b> | <b>1.61</b> | <b>2.19</b> | <b>0.08</b> | <b>1.03</b> | <b>3.64</b> | <b>4.45</b> | <b>0.14</b> | <b>0.88</b> |
| GY | 1              | 2.80        | 3.56        | 0.93        | 1.01        | 1.70        | 2.22        | 0.97        | 1.00        | 1.38        | 1.93        | 0.33        | 0.97        | 3.06        | 3.74        | 0.48        | 0.91        |
|    | 2              | 3.74        | 4.73        | 0.88        | 1.02        | 2.31        | 2.96        | 0.95        | 1.00        | 1.60        | 2.18        | 0.07        | 0.98        | 3.69        | 4.55        | 0.19        | 0.89        |
|    | 3              | 4.08        | 5.11        | 0.86        | 1.02        | 2.72        | 3.47        | 0.93        | 1.01        | 1.55        | 2.12        | 0.03        | 0.94        | 3.94        | 4.79        | 0.06        | 0.92        |
|    | 4              | 4.55        | 5.63        | 0.83        | 1.01        | 3.03        | 3.88        | 0.91        | 1.03        | 1.51        | 2.06        | -0.06       | 0.87        | 3.94        | 4.80        | 0.10        | 1.00        |
|    | 5              | 4.64        | 5.74        | 0.83        | 1.01        | 3.18        | 4.04        | 0.90        | 1.00        | 1.48        | 2.02        | -0.03       | 0.89        | 3.98        | 4.89        | 0.04        | 0.93        |
|    | 6              | 4.56        | 5.77        | 0.83        | 1.01        | 3.13        | 4.05        | 0.90        | 1.00        | 1.43        | 1.96        | 0.01        | 0.87        | 4.09        | 4.95        | 0.01        | 0.92        |
|    | 7              | 4.51        | 5.66        | 0.83        | 1.01        | 3.09        | 3.96        | 0.90        | 0.99        | 1.45        | 2.00        | 0.04        | 0.89        | 4.03        | 4.87        | 0.03        | 0.90        |
|    | <b>Average</b> | <b>4.13</b> | <b>5.17</b> | <b>0.86</b> | <b>1.01</b> | <b>2.74</b> | <b>3.51</b> | <b>0.92</b> | <b>1.00</b> | <b>1.49</b> | <b>2.04</b> | <b>0.06</b> | <b>0.92</b> | <b>3.82</b> | <b>4.65</b> | <b>0.13</b> | <b>0.92</b> |
| XJ | 1              | 2.53        | 3.26        | 0.94        | 0.96        | 2.57        | 3.15        | 0.95        | 1.12        | 1.60        | 2.44        | 0.28        | 2.06        | 3.04        | 3.73        | 0.46        | 0.99        |
|    | 2              | 3.36        | 4.39        | 0.90        | 0.97        | 3.11        | 3.87        | 0.92        | 1.11        | 1.56        | 2.40        | 0.17        | 2.03        | 3.65        | 4.48        | 0.18        | 0.97        |
|    | 3              | 3.67        | 4.65        | 0.88        | 0.97        | 3.42        | 4.28        | 0.91        | 1.14        | 1.48        | 2.32        | 0.02        | 1.94        | 3.81        | 4.64        | 0.09        | 1.00        |
|    | 4              | 3.98        | 5.04        | 0.86        | 0.97        | 3.61        | 4.51        | 0.90        | 1.00        | 1.07        | 1.79        | -0.03       | 1.66        | 3.94        | 4.76        | 0.08        | 1.01        |
|    | 5              | 4.03        | 5.11        | 0.86        | 0.98        | 3.68        | 4.62        | 0.89        | 1.07        | 1.12        | 1.85        | -0.04       | 1.69        | 4.00        | 4.89        | 0.01        | 1.02        |
|    | 6              | 4.08        | 5.18        | 0.85        | 0.97        | 3.59        | 4.54        | 0.90        | 1.15        | 1.12        | 1.84        | -0.07       | 1.69        | 3.99        | 4.84        | 0.04        | 1.02        |
|    | 7              | 4.01        | 5.06        | 0.86        | 0.98        | 3.60        | 4.56        | 0.90        | 1.11        | 1.11        | 1.80        | -0.01       | 1.68        | 3.89        | 3.75        | 0.05        | 0.99        |
|    | <b>Average</b> | <b>3.67</b> | <b>4.67</b> | <b>0.88</b> | <b>0.97</b> | <b>3.37</b> | <b>4.22</b> | <b>0.90</b> | <b>1.10</b> | <b>1.29</b> | <b>2.06</b> | <b>0.05</b> | <b>1.82</b> | <b>3.76</b> | <b>4.58</b> | <b>0.13</b> | <b>1.00</b> |
